# Supplementary material
Source: PubMed Central journal article supplement (PMC5603363)
Supplement: NIHMS866850-supplement-Supp_info.pdf [file NIHMS866850-supplement-Supp_info.pdf]

## Supporting Information

# Mechanistic Analysis of Fluorescence Quenching of Reduced Nicotinamide Adenine Dinucleotide by Oxamate in Lactate Dehydrogenase Ternary Complexes

Huo-Lei Peng and Robert Callender

Department of Biochemistry, Albert Einstein College of Medicine, New York, NY 10461, USA

**Table S1.** Electronic transition energies of dihydronicotinamide related compounds obtained by computations at td-B3LYP/6-31g(d) level and from experimental. Numbers in parentheses are oscillator strength and extinction coefficients ( $M^{-1}cm^{-1}$ ) respectively.

| Compound                                 | Electronic State  | Energy (eV) | Energy (nm)  | Experimental UV-vis Maximum                          |
|------------------------------------------|-------------------|-------------|--------------|------------------------------------------------------|
| 1-methyl-1,4-dihydronicotinamide         | $S_1 (\pi-\pi^*)$ | 3.747       | 331 (0.113)  | 356, Acetone(1)                                      |
|                                          | $S_2 (n-\pi^*)$   | 4.514       | 275 (0.001)  |                                                      |
| Twisted 1-methyl-1,4-dihydronicotinamide | $S_1 (\pi-\pi^*)$ | 3.652       | 340 (0.07)   |                                                      |
|                                          | $S_2 (n-\pi^*)$   | 4.489       | 276 (0.002)  |                                                      |
| 1-methyl-1,4-dihydropyridine             | $S_1 (\pi-\pi^*)$ | 4.417       | 281 (0.034)  | a. 270 (3000), MeOH(2)<br>b. 278 (2500), c-hexane(3) |
| 1-methyl-3-acetyl-1,4-dihydropyridine    | $S_1 (\pi-\pi^*)$ | 3.671       | 338 (0.138)  | c. 371 (10400), EtOH(2, 4)<br>374, Acetonitrile(1)   |
| 1-methyl-1,4,5,6-tetrahydronicotinamide  | $S_1 (n-\pi^*)$   | 4.701       | 264 (0)      | d. 287 (19500), 95% EtOH(5)<br>295, EtOH(6)          |
|                                          | $S_2 (\pi-\pi^*)$ | 4.883       | 253 (0.365)  |                                                      |
|                                          | $S_1 (n-\pi^*)$   | 4.277       | 290 (0.067)† |                                                      |
|                                          | $S_2 (\pi-\pi^*)$ | 4.475       | 277 (0.179)† |                                                      |

### Compounds measured in experimental:

- 1-methyl-4,4-dimethyl-1,4-dihydropyridine(2)
- 1,4-dihydropyridine(3)
- 1-benzyl-3-acetyl-1,4-dihydropyridine(2, 4)
- 1,4,5,6-tetrahydronicotinamide(5)

† At 6-311++g(d,p) level.

**Table S2.** Energies (eV) of locally excited states (LE) and charge transfer (CT) states in vacuum and in water with polarizable continuum model (PCM) at selected dielectric constant ( $\epsilon$ ).

| State | $\epsilon$ | case 1 | case 2 | case 3 | case 4 | case 5 | case 6 | case 7 | case 8 |
|-------|------------|--------|--------|--------|--------|--------|--------|--------|--------|
| LE    | vacuum     | 3.087  | 3.209  | 3.271  | 3.261  | 3.186  | 3.18   | 3.276  | 3.265  |
|       | 4          | 3.103  | 3.149  | 3.21   | 3.203  | 3.177  | 3.178  | 3.246  | 3.265  |
|       | 78         | 3.122  | 3.156  | 3.196  | 3.191  | 3.186  | 3.189  | 3.245  |        |
| CT    | vacuum     | 5.658  | 3.094  | 5.297  | 4.827  | 4.333  | 4.008  | 3.74   | 3.167  |
|       | 4          | 4.989  | 3.284  | 4.814  | 4.5    | 4.27   | 4.032  | 3.851  | 3.167  |
|       | 78         | 4.737  | 3.336  | 4.611  | 4.339  | 4.238  | 4.034  | 3.889  |        |

## REFERENCES:

1. Brewster, M. E., A. Simay, K. Czako, D. Winwood, H. Farag and N. Bodor (1989) Reactivity of biologically important reduced pyridines. IV. Effect of substitution on ferricyanide-mediated oxidation rates of various 1,4-dihydropyridines. *J. Org. Chem.* **54**, 3721-3726.
2. Kosower, E. M. and T. S. Sorensen (1962) The Synthesis and Properties of Some Simple 1,4-Dihydropyridines. *J. Org. Chem.* **27**, 3764-3771.
3. Cook, N. C. and J. E. Lyons (1965) 1,4-Dihydropyridine. *J. Am. Chem. Soc.* **87**, 3283-3284.
4. Anderson, A. G. and G. Berkelhammer (1958) A Study of the Primary Acid Reaction on Model Compounds of Reduced Diphosphopyridine Nucleotide<sup>1,2</sup>. *J. Am. Chem. Soc.* **80**, 992-999.
5. Quan, P. M. and L. D. Quin (1966) 1,4,5,6-Tetrahydropyridines from Catalytic Reduction of Nicotinoyl Derivatives and Their Ring Opening with Hydrazine. *J. Org. Chem.* **31**, 2487-2490.
6. Marti, M., M. Viscontini and P. Karrer (1956) Dihydro-N-methyl-cyan-nicotinsäureamid und N-Methyl-1,4,5,6-tetrahydro-nicotinsäureamid. *Helv. Chim. Acta* **39**, 1451-1454.
7. Martens, F. M., J. W. Verhoeven, R. A. Gase, U. K. Pandit and T. J. de Boer (1978) On the question of one-electron transfer in the mechanism of reduction by nadh-models. *Tetrahedron* **34**, 443-446.

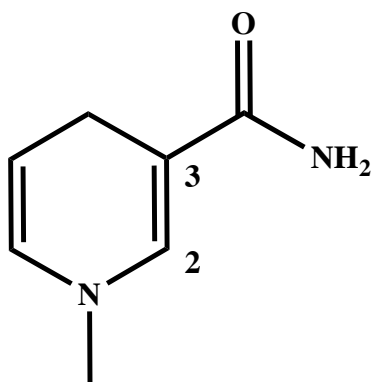

1-methyl-1,4-dihyronicotinamide

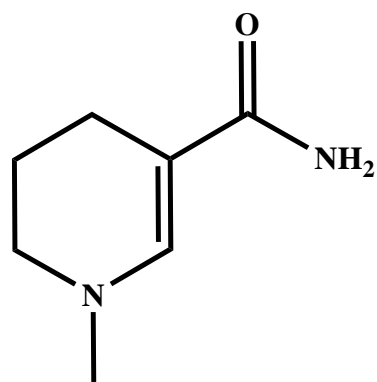

1-methyl-1,4,5,6-tetrahyronicotinamide

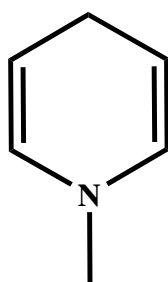

1-methyl-1,4-dihydropyridine

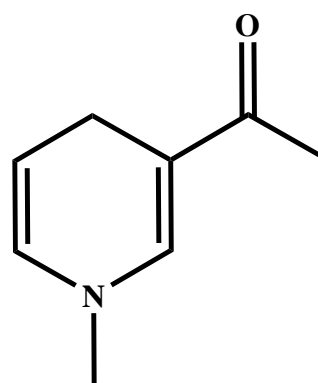

1-methyl-3-acetyl-1,4-dihydropyridine

**Figure S1.** Structures of dihyronicotinamide and related compounds.

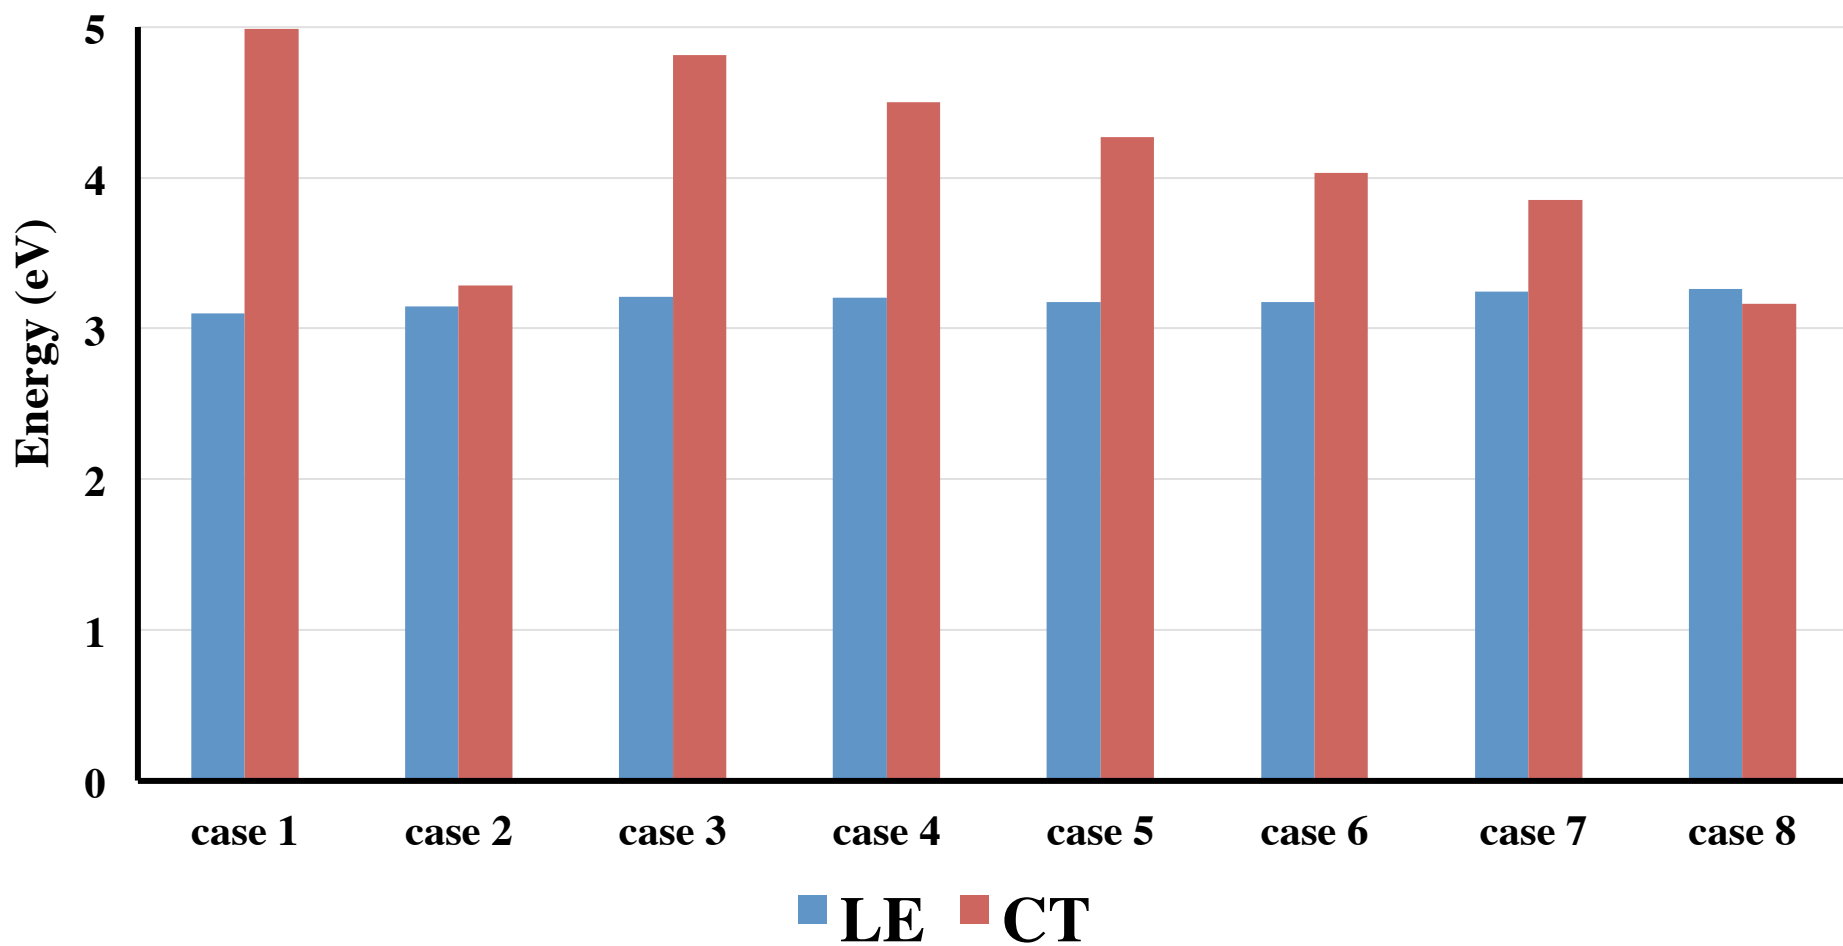

**Figure S2.** Energetic comparison of LE and CT states in selected cases in water (PCM,  $\epsilon=4$ ).

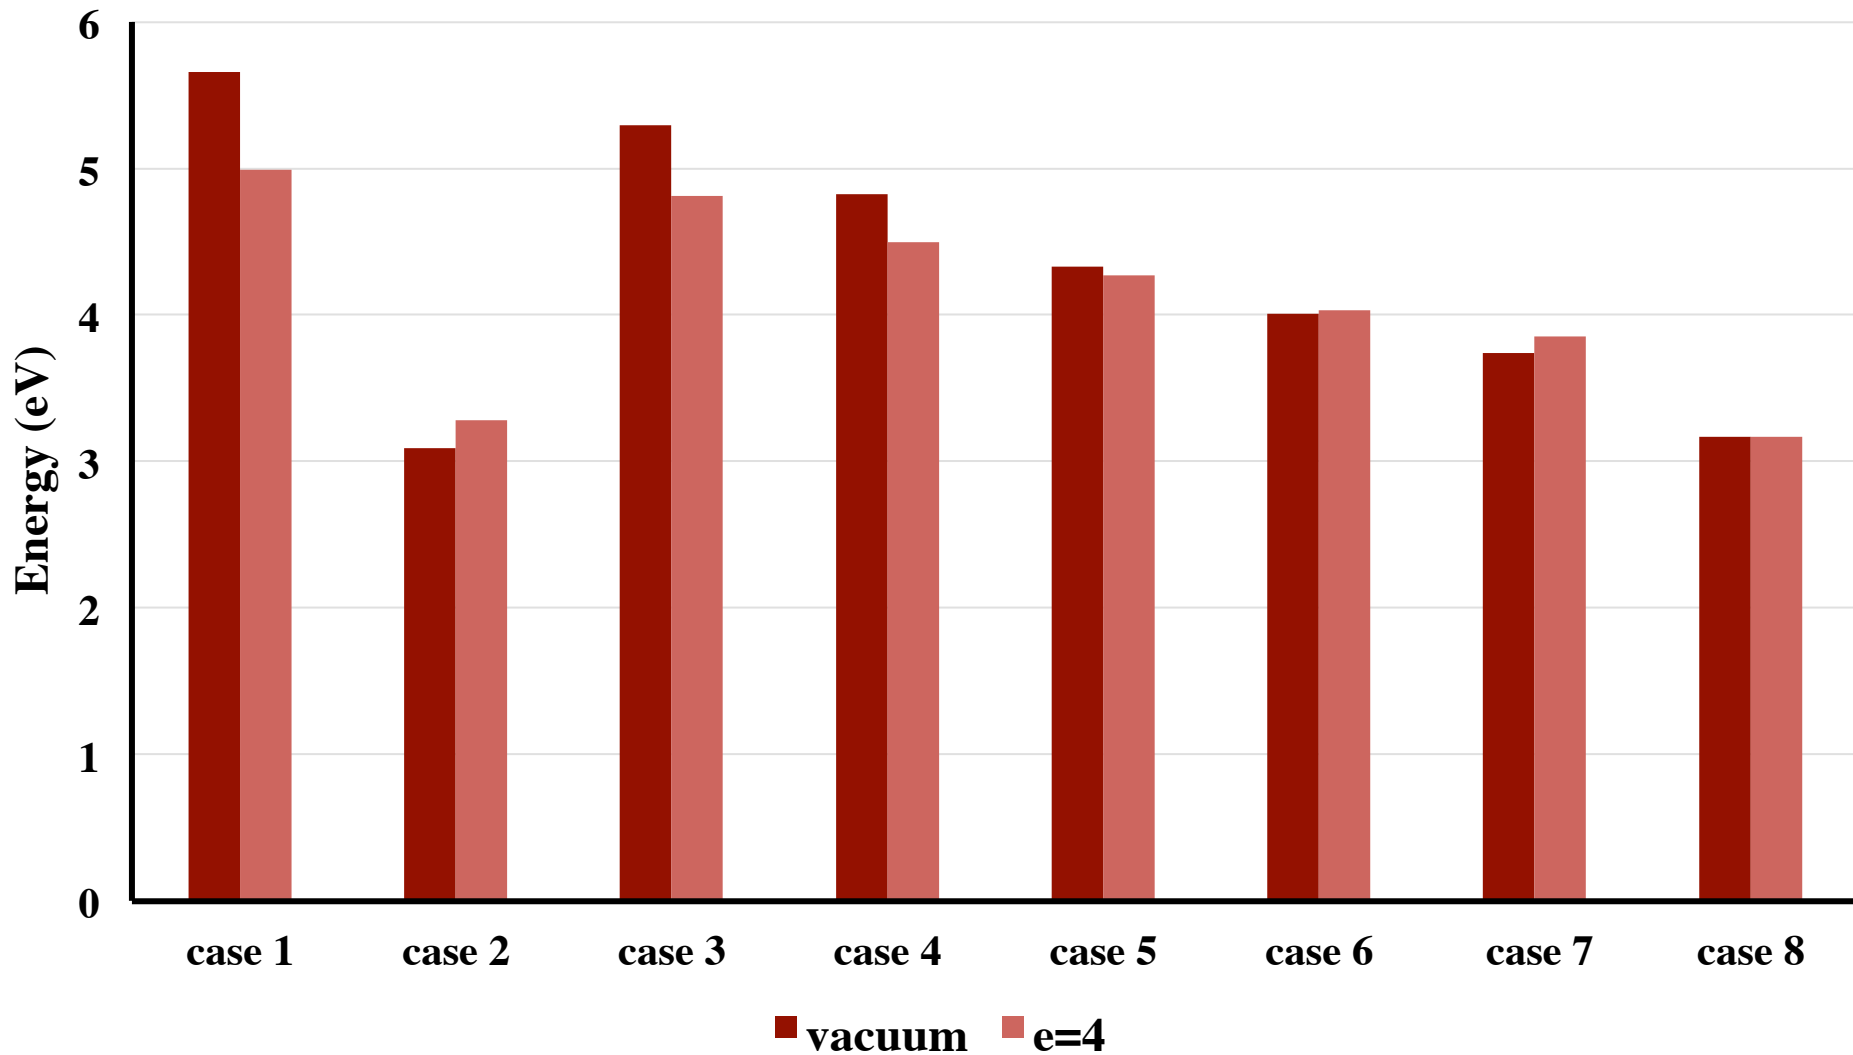

**Figure S3.** Comparison of Energies of CT states in selected cases in vacuum and water (PCM,  $\epsilon=4$ ).

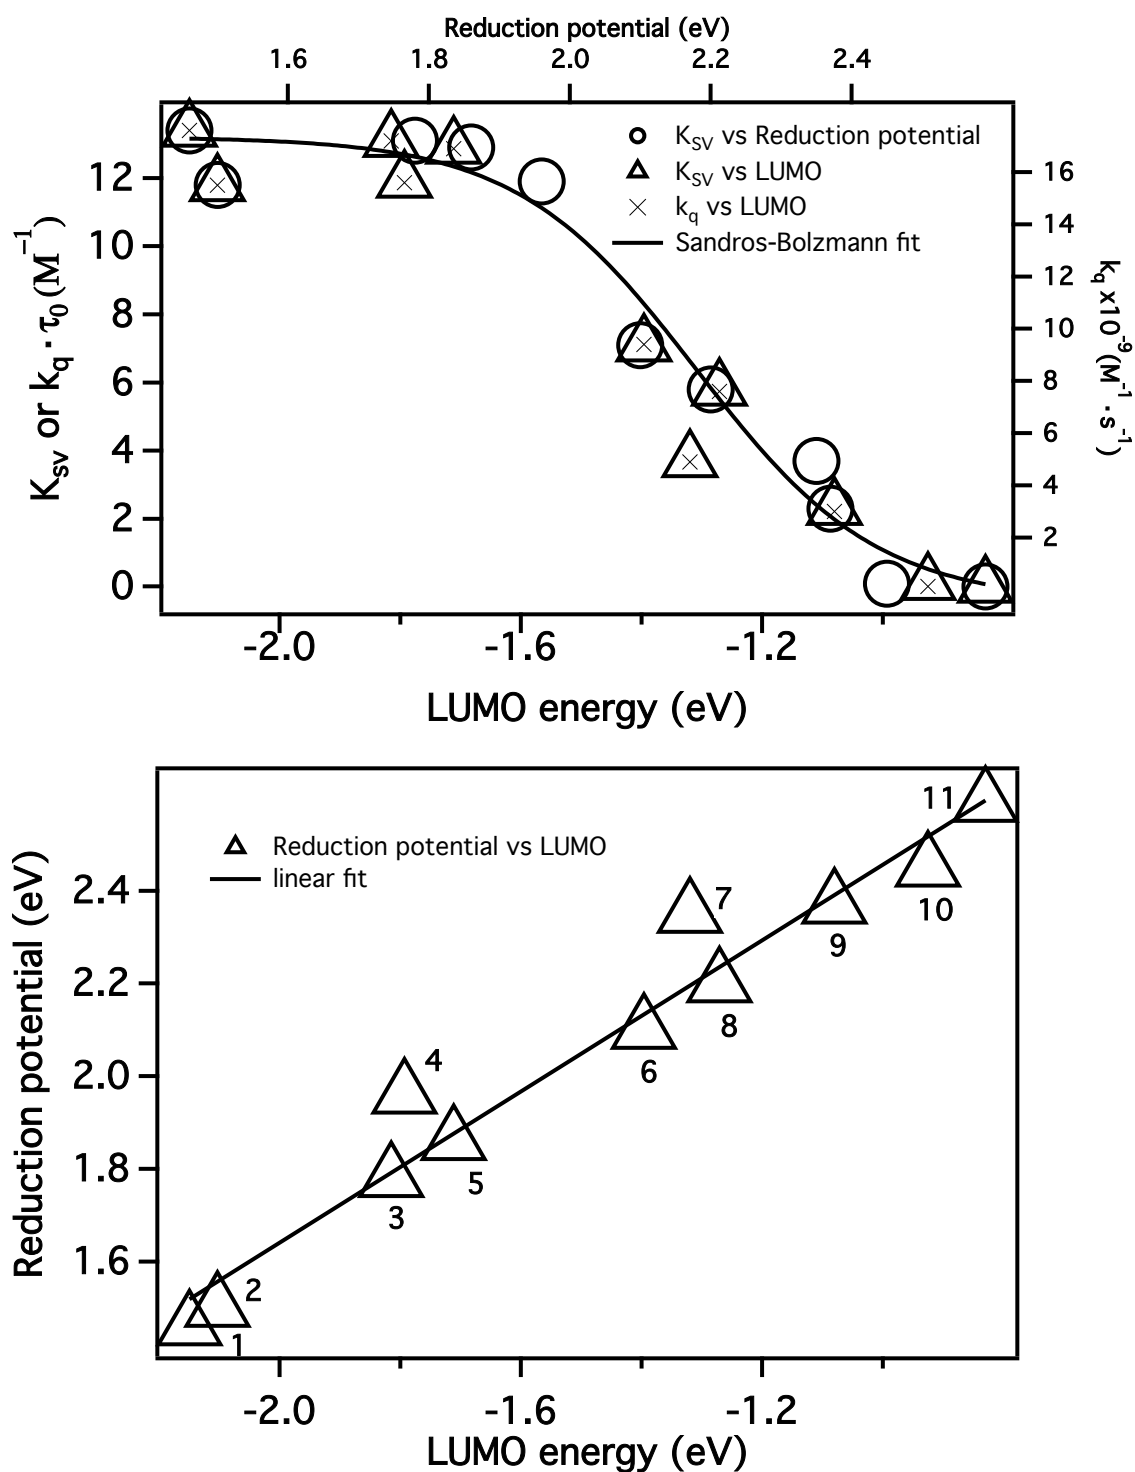

**Figure S4.** Correlation between LUMO energies and the reduction potentials (b) and the quenching constants (a) of selected quenchers. LUMO energies were calculated at B3LYP/6-31g(d) level. The reduction potentials and the quenching constants were from the reference (7). Quenchers in the figure are given in order of increasing LUMO energy: 1. Trifluoroacetophanone, 2. Diethylfumarate, 3. Dimethylterephthalate, 4. 1-Cyanonaphthalene, 5. Benzophenone, 6. Acetophenone, 7. Cyanobenzene, 8. E-stilbene, 9. Methylbenzoate, 10. Styrene, and 11. 1-methylnaphthalene.
